# Supplementary material
Source: PubMed Central journal article supplement (PMC7855791)
Supplement: NIHMS1636220-supplement-1.pdf [file NIHMS1636220-supplement-1.pdf]

## **Supplementary Information:**

### **Structural and functional characterization of the Spo11 core complex**

Corentin Claeys Bouuaert, Sam E. Tischfield, Stephen Pu, Eleni P. Mimitou, Ernesto Arias-Palomo, James M. Berger and Scott Keeney.

#### **Supplementary Tables.**

Supplementary Table 1: XL-MS data (separate Excel file).

Supplementary Table 2: C $\alpha$  distances of Spo11 and Ski8 intramolecular crosslinks.

Supplementary Table 3: Oligonucleotides.

Supplementary Table 4: Plasmids.

Supplementary Table 5: Strains.

Supplementary Table 6: Sequencing statistics.

**Supplementary Table 2: C $\alpha$  distances of Spo11 and Ski8 intramolecular crosslinks.**Spo11 intramolecular crosslinks

| Position 1 | Position 2 | Count -DNA | Count +DNA | C $\alpha$ distance |
|------------|------------|------------|------------|---------------------|
| 121        | 159        | 17         | 65         | 20.2                |
| 121        | 164        | 12         | 34         | 14                  |
| 121        | 270        | 2          | 1          | 29.1                |
| 126        | 159        | 3          | 25         | 22.7                |
| 126        | 164        | 17         | 36         | 13.4                |
| 126        | 270        | 10         | 23         | 27.8                |
| 159        | 164        | 23         | 0          | 13.8                |
| 159        | 270        | 14         | 9          | 19.7                |
| 159        | 317        | 2          | 0          | 35.7                |
| 159        | 334        | 2          | 0          | 57.2                |
| 159        | 350        | 2          | 0          | 36.8                |
| 164        | 196        | 3          | 0          | 29.4                |
| 164        | 206        | 10         | 0          | 25.8                |
| 164        | 258        | 16         | 0          | 20                  |
| 164        | 270        | 17         | 93         | 15.2                |
| 164        | 334        | 2          | 0          | 50.1                |
| 240        | 270        | 0          | 4          | 24.5                |
| 240        | 317        | 2          | 0          | 17.8                |
| 240        | 334        | 4          | 0          | 20                  |
| 247        | 334        | 4          | 0          | 36.4                |
| 270        | 317        | 10         | 2          | 17.5                |
| 270        | 334        | 3          | 0          | 41.9                |
| 270        | 383        | 2          | 2          | 32                  |
| 317        | 334        | 14         | 0          | 26.3                |

Ski8 intramolecular crosslinks

| Position 1 | Position 2 | Count -DNA | C $\alpha$ distance |
|------------|------------|------------|---------------------|
| 3          | 321        | 3          | 14.4                |
| 3          | 365        | 13         | 15.2                |
| 44         | 54         | 1          | 9.3                 |
| 44         | 105        | 30         | 11.2                |
| 44         | 106        | 4          | 13.4                |
| 44         | 365        | 11         | 12.5                |
| 52         | 105        | 3          | 14.1                |
| 52         | 106        | 10         | 8.7                 |
| 62         | 111        | 2          | 15.5                |
| 121        | 147        | 5          | 12                  |



|        |                                                    |
|--------|----------------------------------------------------|
| cb847  | CATCCGTTAAAATTGTAGCTGCTGCACTGAGAATGACGTGG          |
| cb848  | CAGTTTAAAATGTACAGCTGCAACGGATGCTCAGATAAG            |
| cb849  | CTTATCTGAGCATCCGTTGCAGCTGTACATTTTAACTG             |
| cb850  | CAAACCCAGAGAGCTTGCTGCGGCTGCCAAAGGATATCCTG          |
| cb851  | CAGGATATCCTTTGGCAGCCGCAGCAAGCTCTCTGGGTTTG          |
| cb852  | GATATCCTGAAATCTATGCGCTTTCGAGTTATCAAC               |
| cb853  | GTTGATAACTCGGAAAGCGCATAGATTTTCAGGATATC             |
| cb854  | CTATTACCTTTCGAGGCATCAACAAGTCAATTTTTTTTC            |
| cb855  | GAAAAAAAATTGACAGTTGTTGATGCCTCGGAAAGGTAATAG         |
| cb856  | GAAGTGGCAACAAAGTGCAGCTCGCTCCGATATCC                |
| cb857  | GGATATCGGAGCGAGCGCACTTTGTTGCCACTTC                 |
| cb858  | CAACAAAGTTCGCTCGCTGCGGCATCCTACGCCCTAACGAG          |
| cb859  | CTCGTTAGGGCGTAGGATGCCGCAGCGAGCGAACTTTGTTG          |
| cb860  | CTCCGATATCCTACGCCGCAACGAGCAATTCAGTAC               |
| cb861  | GTAAGAATTGCTCGTTGCGGCGTAGGATATCGGAG                |
| cb862  | CTACGCCCTAACGAGCGCTGCAGTACTTCTTCCAATAATG           |
| cb863  | CATTATTGGAAGAAGTACTGCAGCGCTCGTTAGGGCGTAG           |
| cb864  | CTAACGAGCAATTCAGTAGCTGCTGCAATAATGCTTAACATG         |
| cb865  | CATGTTAAGCATTATTGCAGCAGCTACTGAATTGCTCGTTAG         |
| cb866  | CAGTACTTCTTCCAATAGCGGCTAACATGATTGCCCAAG            |
| cb867  | CTTGGGCAATCATGTTAGCCGCTATTGGAAGAAGTACTG            |
| cb868  | CTTCCAATAATGCTTAACGCGGCTGCCCAAGACAAATCTTC          |
| cb869  | GAAGATTTGTCTTGGGCAGCCGCGTTAAGCATTATTGGAAG          |
| cb870  | CTTAACATGATTGCCCAAGCCGCATCTTCAACAACCGCG            |
| cb871  | CGCGGTTGTTGAAGATGCGGCTTGGGCAATCATGTTAAG            |
| cb872  | CCAAGACAAATCTTCAGCAGCCGCGTATCAAATTCTG              |
| cb873  | CAGAATTTGATACGCGGCTGCTGAAGATTTGTCTTGG              |
| cb896  | AATACCATGCTTATTACAGGTAAGGGAGCTCCAGATTTCTTGACAAGG   |
| cb897  | CCTTGTCAAGAAATCTGGAGCTCCCTTACCTGTAATAAGCATGGTATT   |
| cb953  | TAGCAATGTAATCGTCTATGACGTTAACGTCATAGACGATTACATTGCTA |
| cb957  | TAGCAATGTAATCGTCTATGACGTTAACGTCATAGACGATTACATTGC   |
| cb958  | TAGCAATGTAATCGTCTATGACGTT-Biot                     |
| cb959  | AACGTCATAGACGATTACATTGC                            |
| cb960  | AA*CG*TC*AT*AG*ACGATTACATTGC                       |
| cb961  | AACGTCATAGACG*AT*TA*CA*TT*GC                       |
| cb962  | TCGCGCGTTTCGGTGATGA                                |
| cb963  | AATTCACTGGCCGTCGTTTTAC                             |
| cb1061 | TAGCAATGTAATCGTCTATGACGTTAACGTCATAGACGATTACATTGCT  |
| cb1062 | TAGCAATGTAATCGTCTATGACGTTAACGTCATAGACGATTACATTG    |
| cb1063 | TAGCAATGTAATCGTCTATGACGTTAACGTCATAGACGATTACATT     |
| cb1064 | AGCAATGTAATCGTCTATGACGTTAACGTCATAGACGATTACATTGCTA  |
| cb1065 | GCAATGTAATCGTCTATGACGTTAACGTCATAGACGATTACATTGCTA   |

|        |                                                                                                           |
|--------|-----------------------------------------------------------------------------------------------------------|
| cb1066 | CAATGTAATCGTCTATGACGTTAACGTCATAGACGATTACATTGCTA                                                           |
| cb1067 | AATGTAATCGTCTATGACGTTAACGTCATAGACGATTACATTGCTA                                                            |
| cb1027 | ATCTTGGCAGTTAATCGAACAAGACCCGTGCAATGCTATCGACATCAAGGCCTATCGTTACGGGGTTGGA<br>GGTCAATGGGTTCAAGGATGCAGGTGAGGAT |
| cb1028 | CCTTGATGTCGATAGCATTGCACGGGTCTTGTTGATTAAGTCCCAAGATATCCTCACCTGCATCCTGAA<br>CCCATTGACCTCCAACCCCGTAACGATAGG   |
| cb1072 | AACGTCATAGACGATTACATT*GC                                                                                  |
| cb1073 | AACGTCATAGACGATTACA*TTGC                                                                                  |
| cb1074 | AACGTCATAGACGATTA*CATTGC                                                                                  |
| cb1075 | AACGTCATAGACGAT*TACATTGC                                                                                  |
| cb1076 | AACGTCATAGACG*ATTACATTGC                                                                                  |
| cb1077 | AACGTCATAGA*CGATTACATTGC                                                                                  |
| cb1078 | AACGTCATA*GACGATTACATTGC                                                                                  |
| cb1079 | AACGTCA*TAGACGATTACATTGC                                                                                  |
| cb1080 | AACGT*CATAGACGATTACATTGC                                                                                  |
| cb1081 | AAC*GTCATAGACGATTACATTGC                                                                                  |
| cb1082 | Biot-AACGTCATAGACGATTACATTGC                                                                              |
| cb1083 | TA*GCAATGTAATCGTCTATGACGTT                                                                                |
| cb1084 | TAGC*AATGTAATCGTCTATGACGTT                                                                                |
| cb1085 | TAGCAA*TGTAATCGTCTATGACGTT                                                                                |
| cb1086 | TAGCAATG*TAATCGTCTATGACGTT                                                                                |
| cb1087 | TAGCAATGTA*ATCGTCTATGACGTT                                                                                |
| cb1088 | TAGCAATGTAAT*CGTCTATGACGTT                                                                                |
| cb1089 | TAGCAATGTAATCG*TCTATGACGTT                                                                                |
| cb1090 | TAGCAATGTAATCGTC*TATGACGTT                                                                                |
| cb1091 | TAGCAATGTAATCGTCTA*TGACGTT                                                                                |
| cb1092 | TAGCAATGTAATCGTCTATG*ACGTT                                                                                |
| cb1093 | TAGCAATGTAATCGTCTATGAC*GTT                                                                                |
| cb1299 | CATTATACCAGCTCAA <sub>gc</sub> GGGTTTAGTTTATTCGC                                                          |
| cb1300 | GCGAATAAACTAAACCCGCTTGAGCTGGTATAATG                                                                       |
| cb1301 | CAATTATTGAGTTTGAATCAG <sub>gc</sub> CGACTACTCCTTAGCCAAG                                                   |
| cb1302 | CTTGGCTAAGGAGTAGTCGGCCTGATTCAA <sub>gc</sub> ACTCAATAATTG                                                 |

'Biot' indicates the position of a 3'-biotin modification.

'\*' indicates the position of a phosphorothioate modification.

**Supplementary Table 4: Plasmids used in this study.**

| <b>Plasmid</b> | <b>Description</b>                                                                                                  | <b>Reference</b>    |
|----------------|---------------------------------------------------------------------------------------------------------------------|---------------------|
| pCCB586        | Spo11 from <i>S. cerevisiae</i> (SK1 strain) in pFastBac1 (primers cb753 and cb754, digest with BamHI and XhoI)     | This study          |
| pCCB587        | Ski8 from <i>S. cerevisiae</i> (SK1 strain) in pFastBac1 (primers cb755 and cb756, digest with StuI and XhoI)       | This study          |
| pCCB588        | Rec102 from <i>S. cerevisiae</i> (SK1 strain) in pFastBac1 (digest with BamHI and XhoI)                             | This study          |
| pCCB589        | Rec104 from <i>S. cerevisiae</i> (SK1 strain) in pFastBac1 (digest with BamHI and XhoI)                             | This study          |
| pCCB592        | Spo11-HisFlag in pFastBac1 (inverted PCR and self-ligation using pCCB586 as a template and primers cb757 and cb758) | This study          |
| pCCB611        | Spo11-(Y135F)-HisFlag in pFastBac1 (QuikChange on pCCB592 using primers cb806 and cb807)                            | This study          |
| pCCB613        | Spo11-(E233A)-HisFlag in pFastBac1 (QuikChange on pCCB592 using primers cb810 and cb811)                            | This study          |
| pCCB615        | Ski8-HisFlag in pFastBac1 (inverted PCR and self-ligation using template pCCB587, primers cb814 and cb815)          | This study          |
| pCCB616        | Rec104-HisFlag in pFastBac1 (inverted PCR and self-ligation using template pCCB589, primers cb816 and cb817)        | This study          |
| pCCB617        | MBP-Rec102 in pFastBac1 (amplification of MBP from pMAL-c2x using primers cb818 and cb819)                          | This study          |
| pCCB618        | MBP-Ski8 in pFastBac1 (amplification of MBP from pMAL-c2x using primers cb820 and cb821)                            | This study          |
| pCCB619        | MBP-Rec104 in pFastBac1 (amplification of MBP from pMAL-c2x using primers cb822 and cb823)                          | This study          |
| pCCB620        | MBP-Spo11 in pFastBac1 (amplification of MBP from pMAL-c2x using primers cb830 and cb831)                           | This study          |
| pCCB633        | HisFlag-Rec102 in pFastBac1-HTB                                                                                     | This study          |
| pCCB646        | Spo11-(F260A)-HisFlag in pFastBac1 (QuikChange on pCCB592 using primers cb896 and cb897)                            | This study          |
| pCCB814        | Spo11-(K173A)-HisFlag in pFastBac1 (QuikChange on pCCB592 using primers cb1299 and cb1230)                          | This study          |
| pCCB815        | Spo11-(R344A)-HisFlag in pFastBac1 (QuikChange on pCCB592 using primers cb1301 and cb1302)                          | This study          |
| pSK282         | LexA-Rec102 Y2H vector (pCA1-Rec102)                                                                                | Maleki et al., 2007 |
| pSK305         | Gal4AD-Spo11 Y2H vector                                                                                             | Arora et al., 2004  |
| pSK310         | Gal4AD-Rec104 Y2H vector                                                                                            | Arora et al., 2004  |
| pSK276         | Gal4AD empty Y2H vector                                                                                             | Arora et al., 2004  |
| pSK272         | LexA empty Y2H vector                                                                                               | Arora et al., 2004  |
| pCCB655        | pSK282 with Rec102-L26A/L27A (QuikChange primers cb834 and cb835)                                                   | This study          |
| pCCB656        | pSK282 with Rec102-W30A (cb836 and cb837)                                                                           | This study          |
| pCCB657        | pSK282 with Rec102-F90A/W91A (cb838 and cb839)                                                                      | This study          |
| pCCB658        | pSK282 with Rec102-E92A/E93A (cb840 and cb841)                                                                      | This study          |
| pCCB659        | pSK282 with Rec102-Q94A/L95A (cb842 and cb843)                                                                      | This study          |
| pCCB660        | pSK282 with Rec102-F96A/Y97A (cb844 and cb845,)                                                                     | This study          |
| pCCB661        | pSK282 with Rec102-L113A/K114A/C115A (cb846 and cb847)                                                              | This study          |
| pCCB662        | pSK282 with Rec102-I117A/L118A (cb848 and cb849)                                                                    | This study          |
| pCCB663        | pSK282 with Rec102-H134A/T135A/H136A (cb850 and cb851)                                                              | This study          |
| pCCB664        | pSK282 with Rec102-Y145A (cb852 and cb853)                                                                          | This study          |

|         |                                                        |            |
|---------|--------------------------------------------------------|------------|
| pCCB665 | pSK282 with Rec102-L149A (cb854 and cb855)             | This study |
| pCCB666 | pSK282 with Rec102-S206A (cb856 and cb857)             | This study |
| pCCB667 | pSK282 with Rec102-P209A/I210A (cb858 and cb859)       | This study |
| pCCB668 | pSK282 with Rec102-L214A (cb860 and cb861,)            | This study |
| pCCB669 | pSK282 with Rec102-N217A/S218A (cb862 and cb863)       | This study |
| pCCB670 | pSK282 with Rec102-L220A/L221A/P222A (cb864 and cb865) | This study |
| pCCB671 | pSK282 with Rec102-M224A/L225A (cb866 and cb867)       | This study |
| pCCB672 | pSK282 with Rec102-M227A/I228A (cb868 and cb869)       | This study |
| pCCB673 | pSK282 with Rec102-D231A/K232A (cb870 and cb871)       | This study |
| pCCB674 | pSK282 with Rec102-T235A/T236A (cb872 and cb873)       | This study |
| pSK806  | Spo11-HisFlag::HphMX4 in pUC19                         | This study |
| pSK809  | Spo11-(F260A)-HisFlag::HphMX4 in pUC19                 | This study |
| pCCB822 | Spo11-(K173A)-HisFlag::HphMX4 in pUC19                 | This study |
| pCCB823 | Spo11-(R344A)-HisFlag::HphMX4 in pUC19                 | This study |

**Supplementary Table 5: Yeast strains used in this study.**

| <b>Strain</b> | <b>Genotype</b>                                                                                                                                                                    |
|---------------|------------------------------------------------------------------------------------------------------------------------------------------------------------------------------------|
| SKY661        | <i>MATa</i> , <i>ho::LYS2</i> , <i>lys2</i> , <i>leu2::hisG</i> , <i>trp1::hisG</i> , <i>ndt80::kanMX</i> , <i>LexA(op)-LacZ::URA3</i>                                             |
| SKY662        | <i>MATα</i> , <i>ho::LYS2</i> , <i>lys2</i> , <i>leu2::hisG</i> , <i>trp1::hisG</i> , <i>ndt80::kanMX</i> , <i>LexA(op)-LacZ::URA3</i>                                             |
| SKY1311       | <i>MATα</i> , <i>ho::LYS2</i> , <i>lys2</i> , <i>ura3</i> , <i>leu2::hisG</i> , <i>trp1::hisG</i> , <i>arg4-nsp</i> , <i>rec102Δ::URA3</i>                                         |
| SKY1312       | <i>MATa</i> , <i>ho::LYS2</i> , <i>lys2</i> , <i>ura3</i> , <i>leu2::hisG</i> , <i>trp1::hisG</i> , <i>arg4-bgl</i> , <i>rec102Δ::URA3</i>                                         |
| SKY5788       | <i>MATa</i> , <i>ho::LYS2</i> , <i>lys2</i> , <i>ura3</i> , <i>leu2::hisG</i> , <i>arg4-Nsp</i> , <i>nuc1Δ::LEU2</i> , <i>SPO11-His6-flag3-HphMX4</i>                              |
| SKY5789       | <i>MATα</i> , <i>ho::LYS2</i> , <i>lys2</i> , <i>ura3</i> , <i>leu2::hisG</i> , <i>arg4-Nsp</i> , <i>nuc1Δ::LEU2</i> , <i>SPO11-His6-flag3-HphMX4</i>                              |
| SKY5797       | <i>MATa</i> , <i>ho::LYS2</i> , <i>lys2</i> , <i>ura3</i> , <i>leu2::hisG</i> , <i>arg4-Nsp</i> , <i>nuc1Δ::LEU2</i> , <i>SPO11(F260A)-His6-flag3-HphMX4</i>                       |
| SKY5798       | <i>MATα</i> , <i>ho::LYS2</i> , <i>lys2</i> , <i>ura3</i> , <i>leu2::hisG</i> , <i>arg4-Nsp</i> , <i>nuc1Δ::LEU2</i> , <i>SPO11(F260A)-His6-flag3-HphMX4</i>                       |
| SKY5806       | <i>MATa</i> , <i>ho::LYS2</i> , <i>lys2</i> , <i>ura3</i> , <i>leu2::hisG</i> , <i>arg4-Nsp</i> , <i>nuc1Δ::LEU2</i> , <i>SPO11-His6-flag3-HphMX4</i> , <i>sae2Δ::KanMX6</i>       |
| SKY5807       | <i>MATα</i> , <i>ho::LYS2</i> , <i>lys2</i> , <i>ura3</i> , <i>leu2::hisG</i> , <i>arg4-Nsp</i> , <i>nuc1Δ::LEU2</i> , <i>SPO11-His6-flag3-HphMX4</i> , <i>sae2Δ::KanMX6</i>       |
| SKY6621       | <i>MATa</i> , <i>ho::LYS2</i> , <i>lys2</i> , <i>ura3</i> , <i>leu2::hisG</i> , <i>arg4-Nsp</i> , <i>nuc1Δ::LEU2</i> , <i>SPO11(F260A)-His6-flag3-HphMX4</i> , <i>sae2::KanMX6</i> |
| SKY6622       | <i>MATα</i> , <i>ho::LYS2</i> , <i>lys2</i> , <i>ura3</i> , <i>leu2::hisG</i> , <i>arg4-Nsp</i> , <i>nuc1Δ::LEU2</i> , <i>SPO11(F260A)-His6-flag3-HphMX4</i> , <i>sae2::KanMX6</i> |
| SKY6615       | <i>MATa</i> , <i>ho::LYS2</i> , <i>lys2</i> , <i>ura3</i> , <i>leu2::hisG</i> , <i>SPO11(K173A)-His6-flag3-HphMX4</i>                                                              |
| SKY6616       | <i>MATα</i> , <i>ho::LYS2</i> , <i>lys2</i> , <i>ura3</i> , <i>leu2::hisG</i> , <i>SPO11(K173A)-His6-flag3-HphMX4</i>                                                              |
| SKY6617       | <i>MATa</i> , <i>ho::LYS2</i> , <i>lys2</i> , <i>ura3</i> , <i>leu2::hisG</i> , <i>SPO11(R344A)-His6-flag3-HphMX4</i>                                                              |
| SKY6618       | <i>MATα</i> , <i>ho::LYS2</i> , <i>lys2</i> , <i>ura3</i> , <i>leu2::hisG</i> , <i>SPO11(R344A)-His6-flag3-HphMX4</i>                                                              |

All strains are from the SK1 background.



**Supplementary Table 6: Sequencing statistics.**

| <b>S1-seq</b>             |                        |                                 |                                   |                                               |
|---------------------------|------------------------|---------------------------------|-----------------------------------|-----------------------------------------------|
| <b>Dataset</b>            | <b>Total Sequenced</b> | <b>Total Mapped<sup>a</sup></b> |                                   | <b>Uniquely mapped to sacCer2<sup>b</sup></b> |
| Spo11 sae2 sample 1       | 13,883,720             | 12,589,142 (90.7%)              |                                   | 8,735,385 (69.4%)                             |
| Spo11 sae2 sample 2       | 10,602,809             | 9,622,551 (90.8%)               |                                   | 6,748,120 (70.1%)                             |
| Spo11-F260A sae2 sample 1 | 7,814,010              | 7,351,934 (94.1%)               |                                   | 4,498,753 (61.2%)                             |
| Spo11-F260A sae2 sample 2 | 29,127,904             | 27,114,286 (93.1%)              |                                   | 16,477,694 (60.8%)                            |
| <b>Spo11-oligos</b>       |                        |                                 |                                   |                                               |
| <b>Dataset</b>            | <b>Total Sequenced</b> | <b>Total Mapped<sup>c</sup></b> | <b>Total Filtered<sup>d</sup></b> | <b>Uniquely mapped to sacCer2<sup>e</sup></b> |
| Spo11-F260A sample 1      | 16,534,430             | 15,909,570 (96.2%)              | 14,160,043 (85.6%)                | 13,247,190 (80.1%)                            |
| Spo11-F260A sample 2      | 13,176,831             | 12,813,774 (97.2%)              | 11,453,354 (86.9%)                | 11,175,114 (84.8%)                            |
| Spo11 wild type sample 1  | 9,599,502              | 9,428,776 (98.2%)               | 8,236,687 (85.8%)                 | 8,043,287 (83.8%)                             |
| Spo11 wild type sample 2  | 9,968,154              | 9,312,052 (93.4%)               | 8,274,465 (83%)                   | 7,794,920 (78.2%)                             |

<sup>a</sup> Percent of sequences mapped relative to total number of reads.

<sup>b</sup> Percent of sequences mapped uniquely relative to total number of mapped reads.

<sup>c</sup> The fraction of sequences that could not be mapped likely reflect sequencing errors, adapter dimers, PCR dimers and bona fide Spo11-oligos derived from genomic regions that are unique to SK1 (i.e., not found in the S288C reference genome assembly).

<sup>d</sup> Total number of reads that were filtered to remove reads with poor alignment and/or adapter clipping.

<sup>e</sup> Total number of reads that mapped to only one position in the genome.
